# Supplementary material for: MicroRNA29a regulates IL-33-mediated tissue remodelling in tendon disease
Source: PubMed Central journal article supplement (PMC4403384; doi:10.1038/ncomms7774), 2015-04-10
Supplement: ncomms7774-s1.pdf [file ncomms7774-s1.pdf]

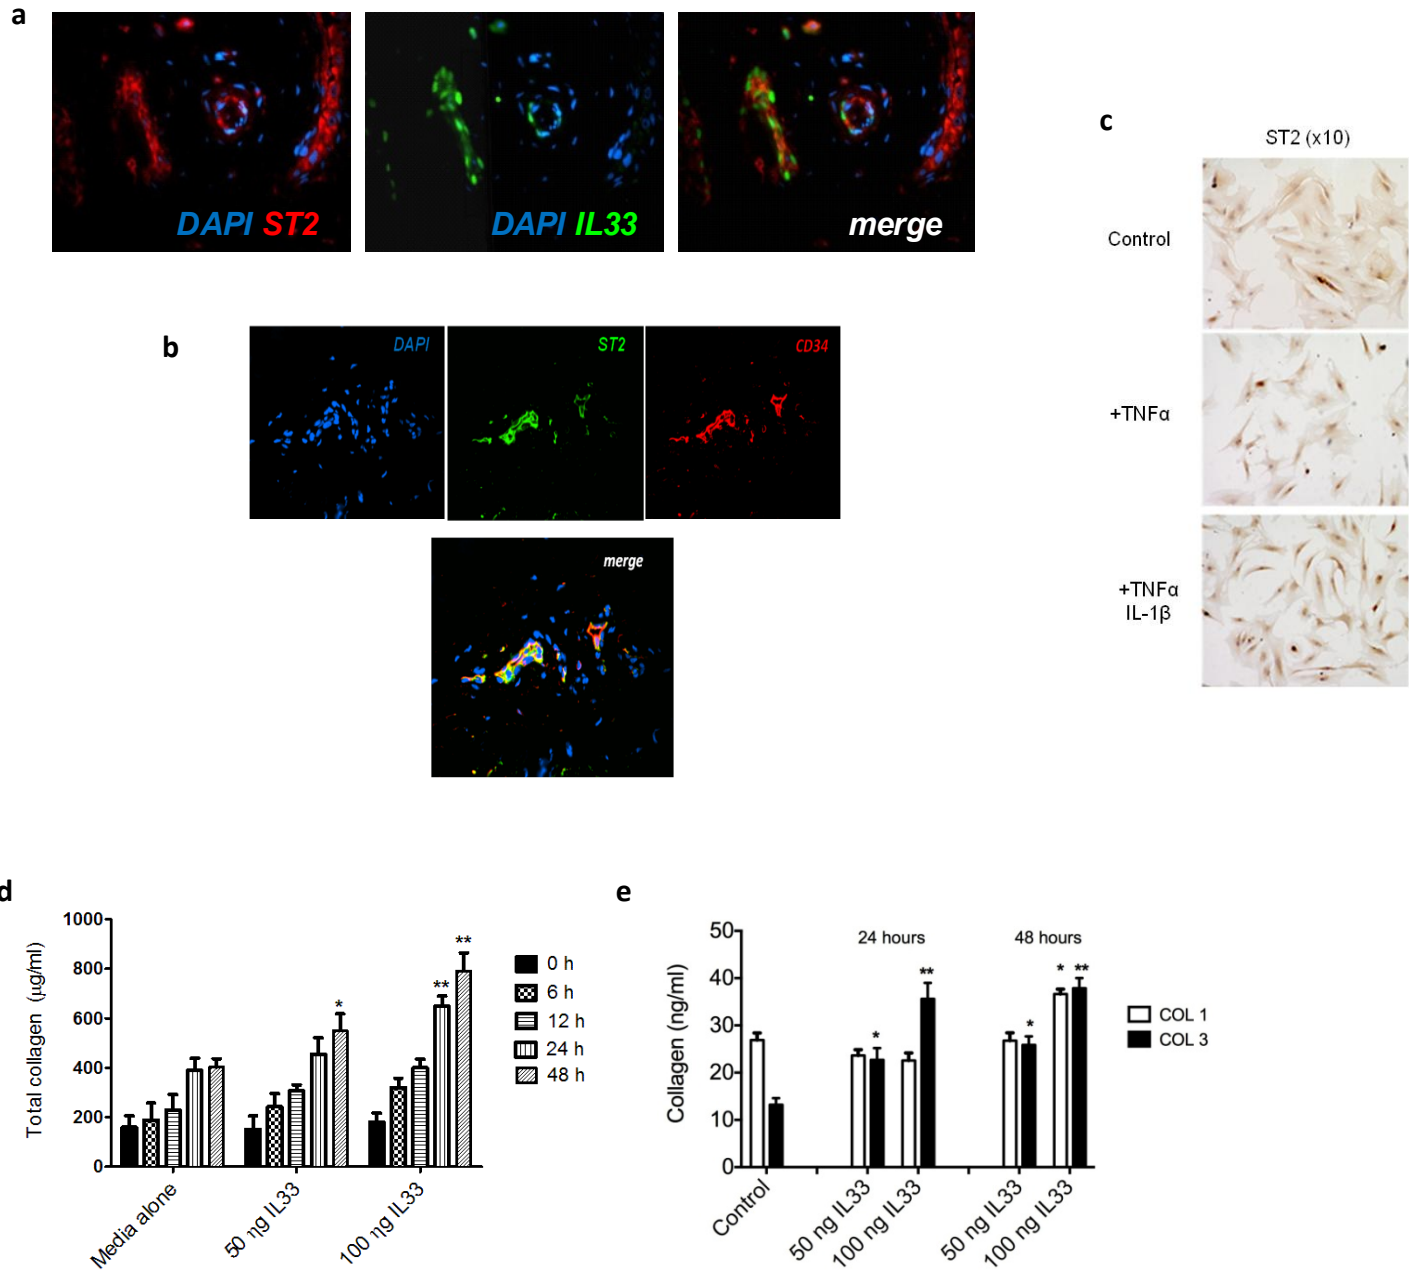

Supplementary Figure 1

## Supplementary Figure 1

Expression of IL-33, ST2 and the production of collagens and cytokines by human tenocytes. **(a)** Double immunofluorescence staining of IL33 and ST2 in perivascular regions and tenocytes in human tendinopathy ('early pathology'). **(b)** ST2 and CD34 double positive cells staining in vascular region. **(c)** ST2 staining in explanted control human tenocytes cultured with medium alone, 100 ng/ml TNF $\alpha$ , or 100 ng/ml TNF $\alpha$  + 100 ng/ml IL-1 $\beta$ . **(d)** Time course of total collagen production in the supernatant by human control tenocytes cultured with rhIL-33. **(e)** Collagen 1 and 3 concentrations in the supernatant of control human tenocytes cultured with rIL-33. Data in **d, e** are mean  $\pm$  SD of triplicate samples determined by ELISA, representative of three individual patient samples. \*p<0.05, \*\*p<0.01 vs corresponding control samples. (Mann-Whitney).

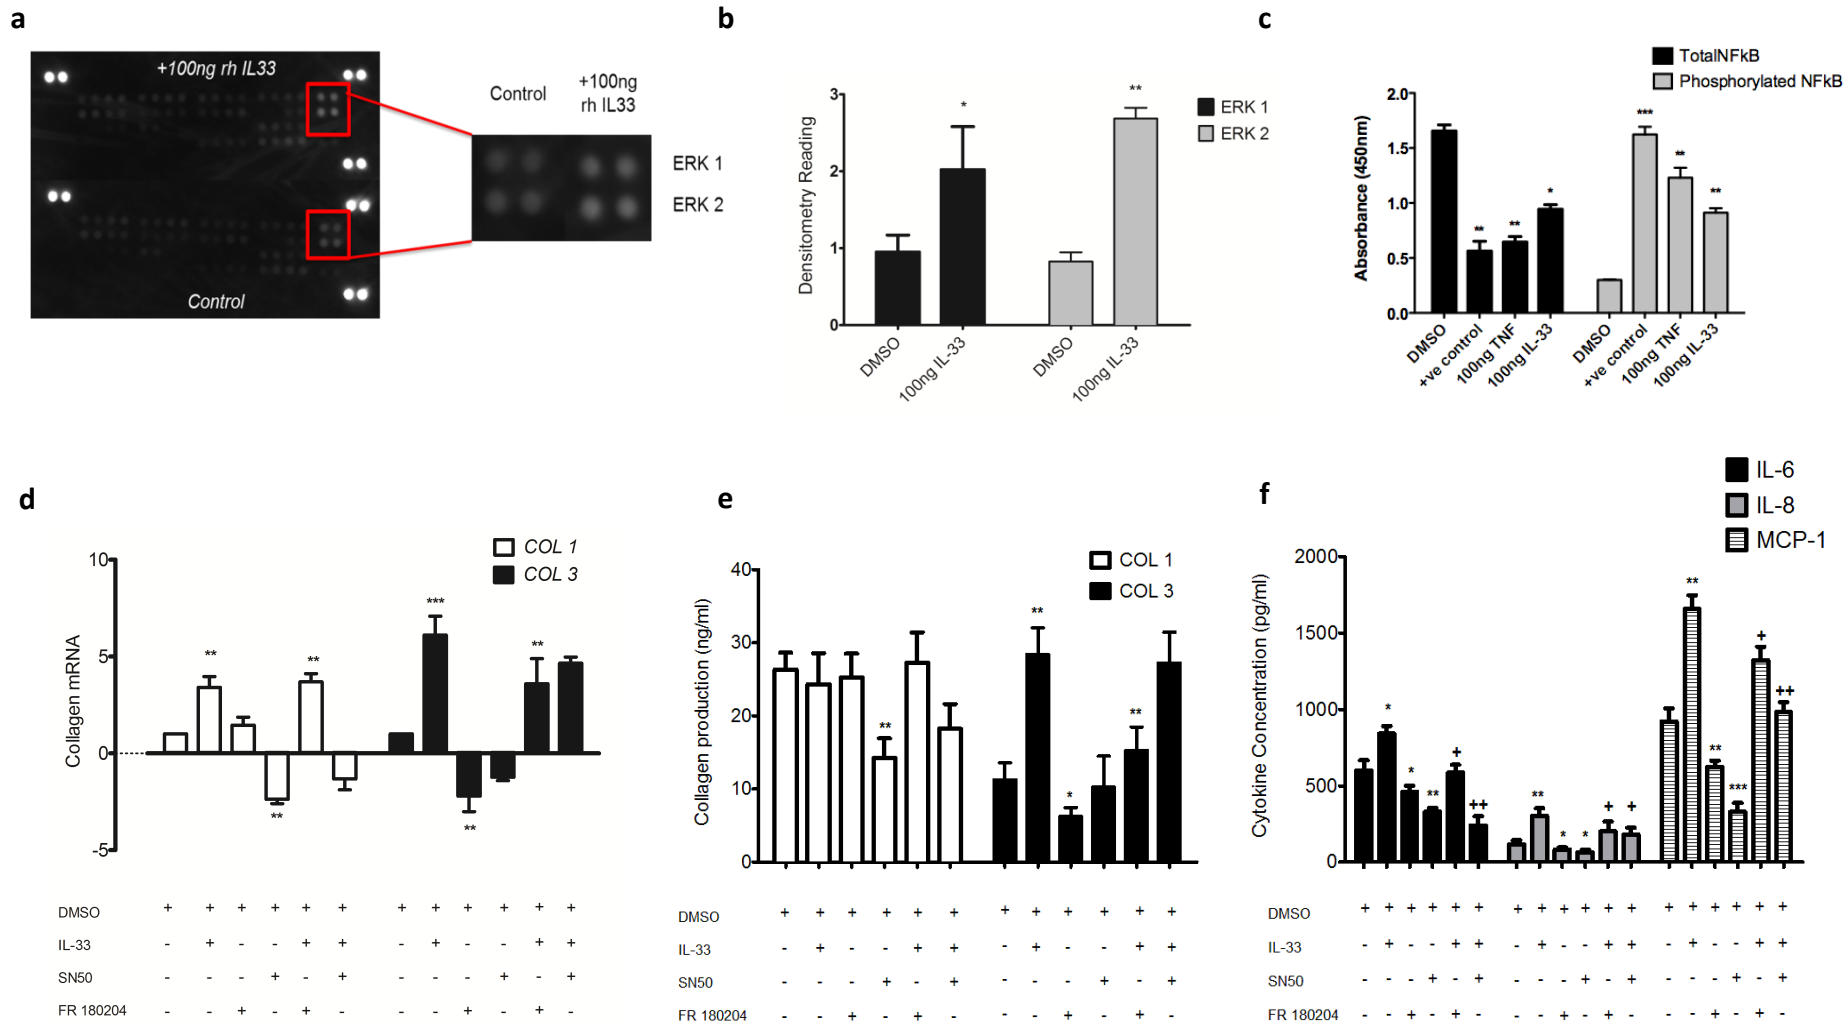

## Supplementary Figure 2

The role of ERK and NF $\kappa$ B in the production of collagen and cytokines by IL-33-activated human tenocytes. **(a)** Whole-cell lysates of control human tendon explant were examined by Human Phospho-MAPK Array for the phosphorylation of MAPK's 1 h after cultured with rhIL-33. **(b)** The fold change of MAPK's was determined by densitometry and normalised to the control sample on the array. Data are mean fold change  $\pm$  SD of duplicate samples, representative of five individual donors of tendon explant tissue. \* $p < 0.05$ , \*\* $p < 0.01$  compared to DMSO control (Student's *t*-test). **(c)** Whole-cell lysates were examined by ELISA for total NF $\kappa$ B and phosphorylated NF $\kappa$ B in tenocyte cultured for 24 h with TNF $\alpha$  and IL-33. Data are mean  $\pm$  SD of three individual experiments. \* $p < 0.05$ , \*\* $p < 0.01$ , \*\*\* $p < 0.001$  vs respective DMSO controls. (Student's *t*-test). **(d-f)** Control human tenocytes were cultured as indicated for 24 h with rhIL-33 and ERK (FR 180204) or NF $\kappa$ B (SN050) inhibitor. **(d)** Levels of mRNA for Collagen 1 and 3 in the cells were determined by q-PCR. **(e)** Concentrations of Collagen 1 and 3 protein (ELISA) and **(f)** concentrations of cytokine (Luminex) in the supernatant were determined. Data are mean  $\pm$  SD of triplicate samples and represent experiments on five individual patient samples. \* $p < 0.05$ , \*\* $p < 0.01$ , \*\*\* $p < 0.01$  vs control samples (DMSO). + $p < 0.05$ , ++ $p < 0.01$  vs DMSO+IL-33 (ANOVA).

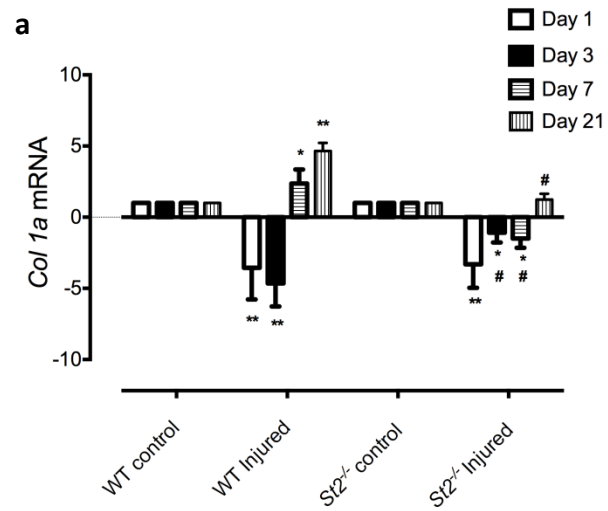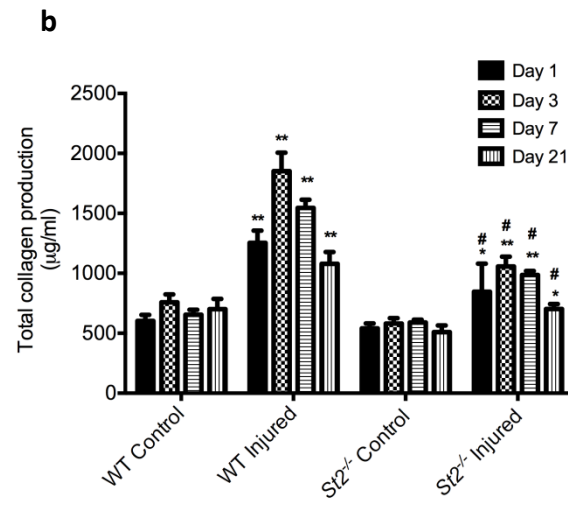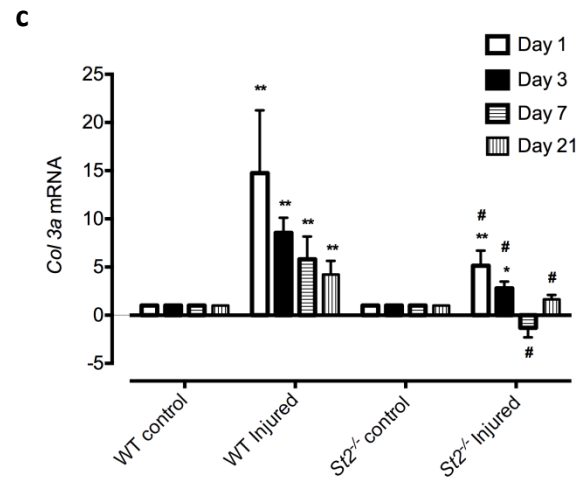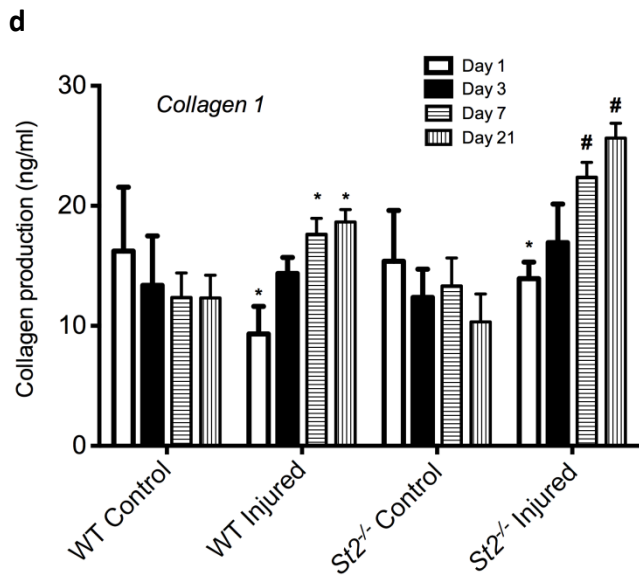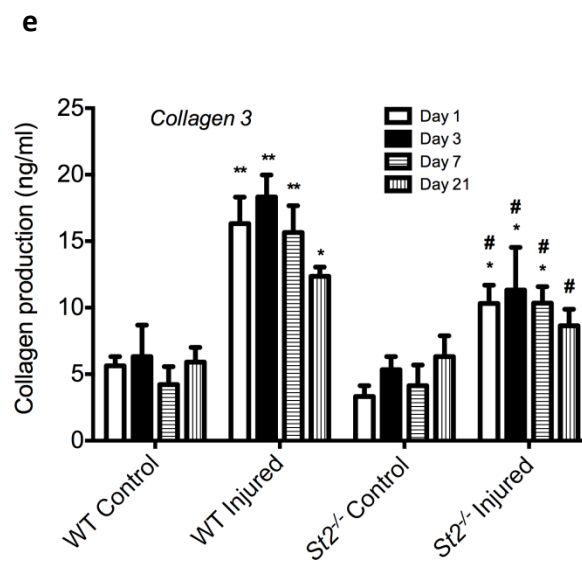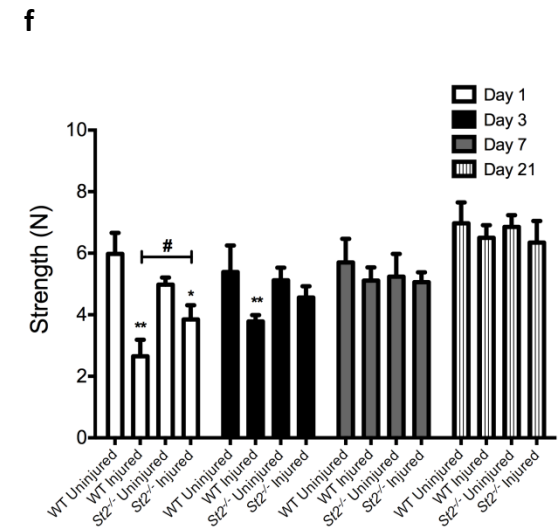

### Supplementary Figure 3

Effect of ST2-deficiency on injury-induced collagen production by the tendon and tendon strength. **(a)** *Col1a* message levels in the tendon of WT and *St2*<sup>-/-</sup> mice post injury determined by q-PCR. \*p<0.05, \*\*p<0.01 WT/*St2*<sup>-/-</sup> injured mice vs control; # p<0.05, *St2*<sup>-/-</sup> injured mice vs WT injured mice. (ANOVA). **(b)** Total collagen level in the tendon of WT and *St2*<sup>-/-</sup> mice post injury determined by Sircol assay. \*p<0.05, \*\*p<0.01 WT/ *St2*<sup>-/-</sup> injured mice vs control; # p<0.01, *St2*<sup>-/-</sup> injured mice vs WT injured mice. (ANOVA). **(c)** *Col3a* message levels in the tendon of WT and *St2*<sup>-/-</sup> mice post injury determined by q-PCR. Data are mean fold change ± SD of duplicate samples, representative of four mice per group. \*p<0.05, \*\*p<0.01 WT/ *St2*<sup>-/-</sup> injured mice vs control; # p<0.01, *St2*<sup>-/-</sup> injured mice vs WT injured mice. (ANOVA). **(d,e)** Collagen 1 and 3 protein levels post injury was determined by ELISA. WT mice showed significantly greater production of Collagen 1 on days 7 and 21 post injury compared to *St2*<sup>-/-</sup> mice in the injured groups. The most significant difference is the lack of collagen 3 production in *St2*<sup>-/-</sup> mice at all time points post injury compared to the injured WT mice group. Data are mean fold change ± SD of duplicate samples representative of four mice per group. \*p<0.05, \*\*p<0.01 WT/*St2*<sup>-/-</sup> injured mice vs control; # p<0.01, *St2*<sup>-/-</sup> injured mice vs WT injured mice. (ANOVA). **(f)** Time course of tensile strength (load to failure, N=Newton's (force/unit area)) for WT and *St2*<sup>-/-</sup> mice injured and uninjured tendons. Data are mean fold change ± SD of duplicate samples, representative of four mice per group. \*p<0.05, \*\*p<0.01 control vs injured mice. +p<0.05, ++p<0.01, WT injured vs *St2*<sup>-/-</sup> injured mice. (ANOVA). Data for mRNA are relative to 18s housekeeping gene.

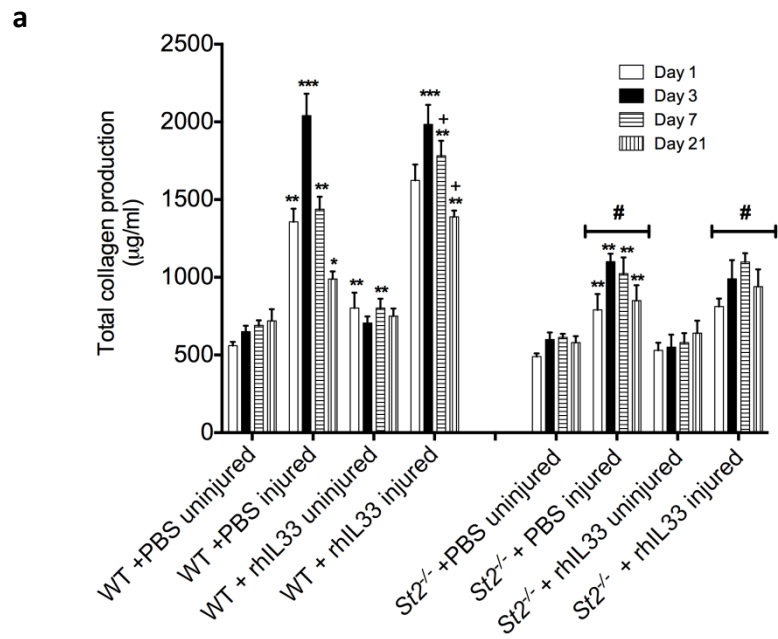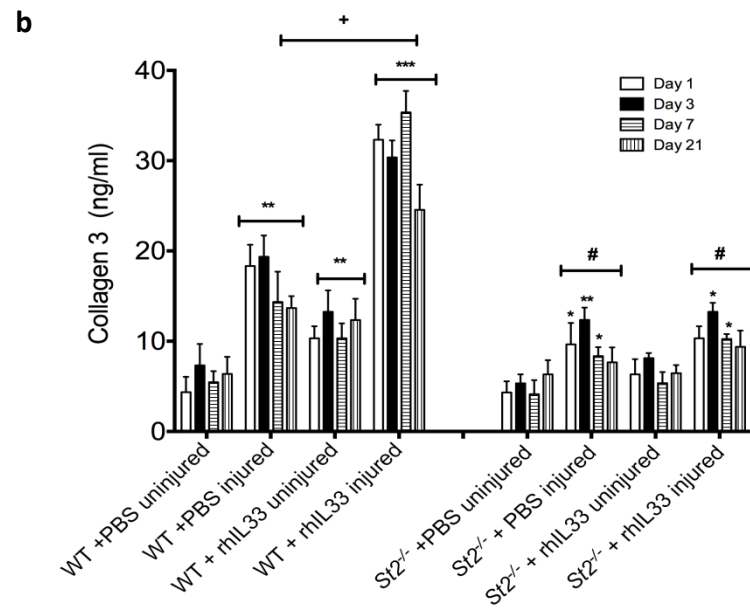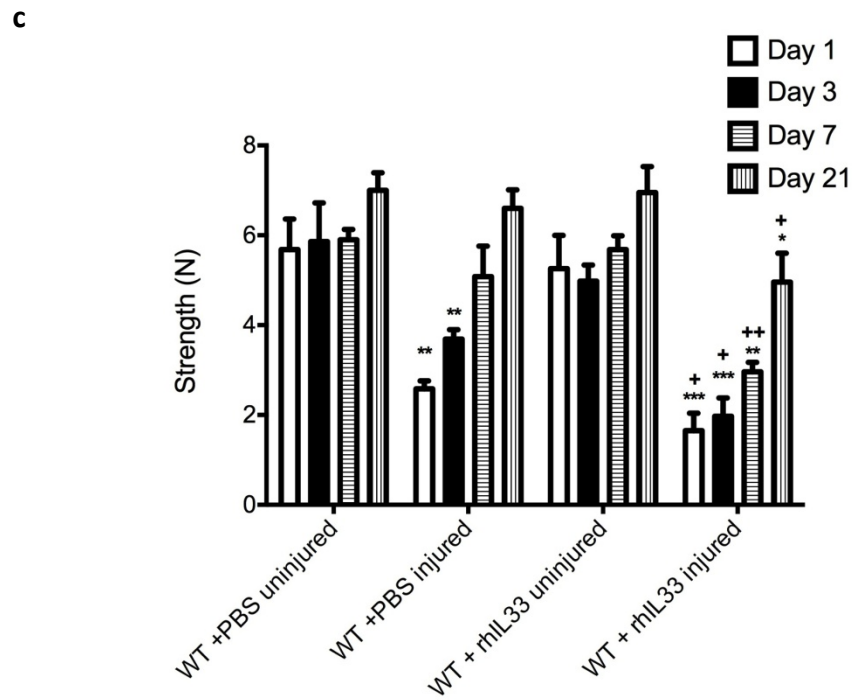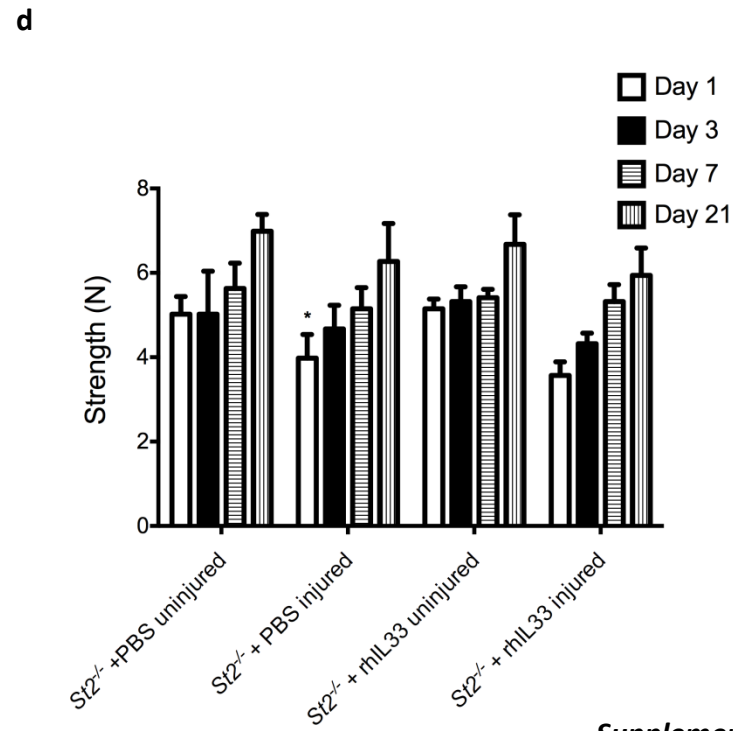

## Supplementary Figure 4

Effect of IL-33 on collagen production and tensile strength of murine tendon. (a) Total collagen production (Sircol) and (b) Collagen 3 protein (ELISA) in WT and St2<sup>-/-</sup> mice treated with rhIL-33. The most significant shift was in the production of Collagen 3 protein in WT mice treated with rhIL-33 at all-time points post injury. However significant differences were only noted between PBS injured mice vs rhIL-33 injured mice on Days 7 and 21, suggesting that endogenous IL-33 is likely responsible for the majority of early collagen changes. Data are mean fold change  $\pm$  SD of duplicate samples and are representative of 4 mice per group. \* $p < 0.05$ , \*\* $p < 0.01$ , \*\*\* $p < 0.001$  injured mice vs uninjured mice. #  $p < 0.05$ , WT vs St2<sup>-/-</sup> mice. (ANOVA). (c, d) Tendon strength of WT and St2<sup>-/-</sup> mice treated with IL-33. rhIL-33 treatment led to a significantly decreased in tensile strength in WT uninjured and injured mice (c) but not in St2<sup>-/-</sup> mice (d) on Days 1 and 3 of the treatment. WT injured mice had 45% decrease in strength when treated with rhIL-33 on days 1 and 3 post injury, and with 20% decrease in strength on 21 days post injury compared to PBS injection alone. Data are mean fold change  $\pm$  SD of duplicate samples, representative of 4 mice per group. \* $p < 0.05$ , \*\* $p < 0.01$ , \*\*\* $p < 0.001$  injured vs uninjured mice. +  $p < 0.05$ , ++  $p < 0.01$ , WT vs St2<sup>-/-</sup> mice. (ANOVA).



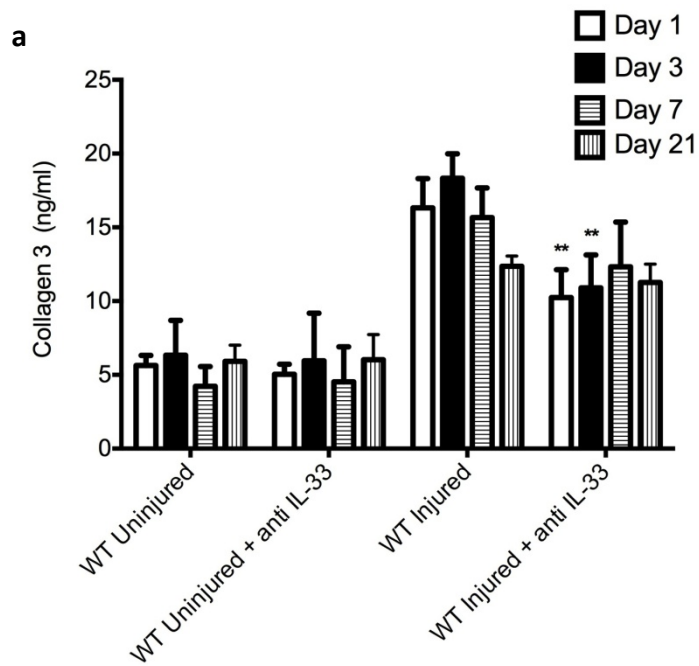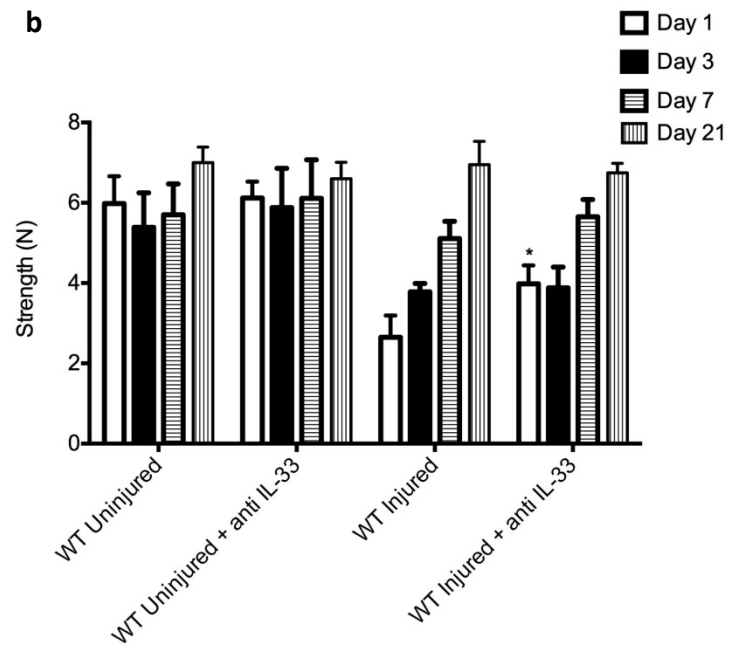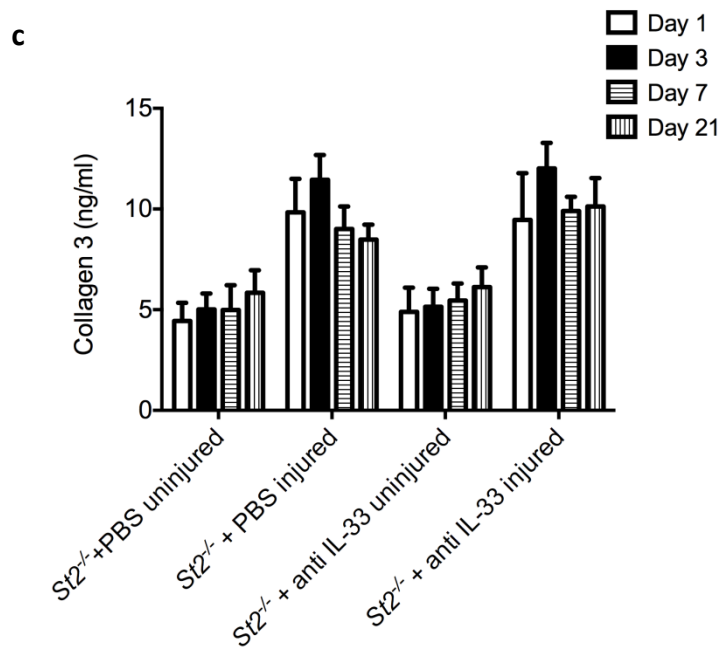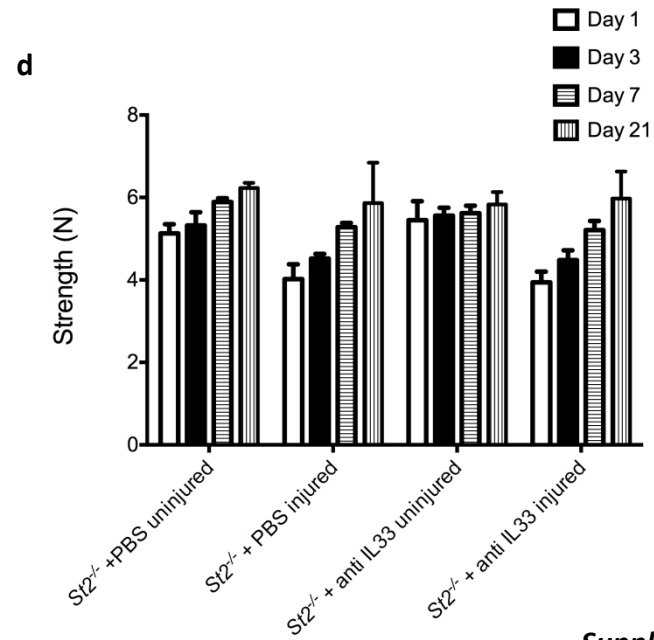

## Supplementary Figure 5

Collagen 3 production and tensile strength of tendon in mice treated with anti-IL-33 antibody. **(a, c)** Time course of collagen 3 protein production (ELISA) and **(b, d)** tensile strength in WT **(a, b)** and *St2*<sup>-/-</sup> **(c, d)** injured or uninjured mice treated with anti-IL33 antibody or not. Data are mean fold change  $\pm$  SD of duplicate samples, representative of 4 mice per group. \* $p < 0.05$ , \*\* $p < 0.01$ , WT + anti-IL33 vs WT injured (ANOVA).

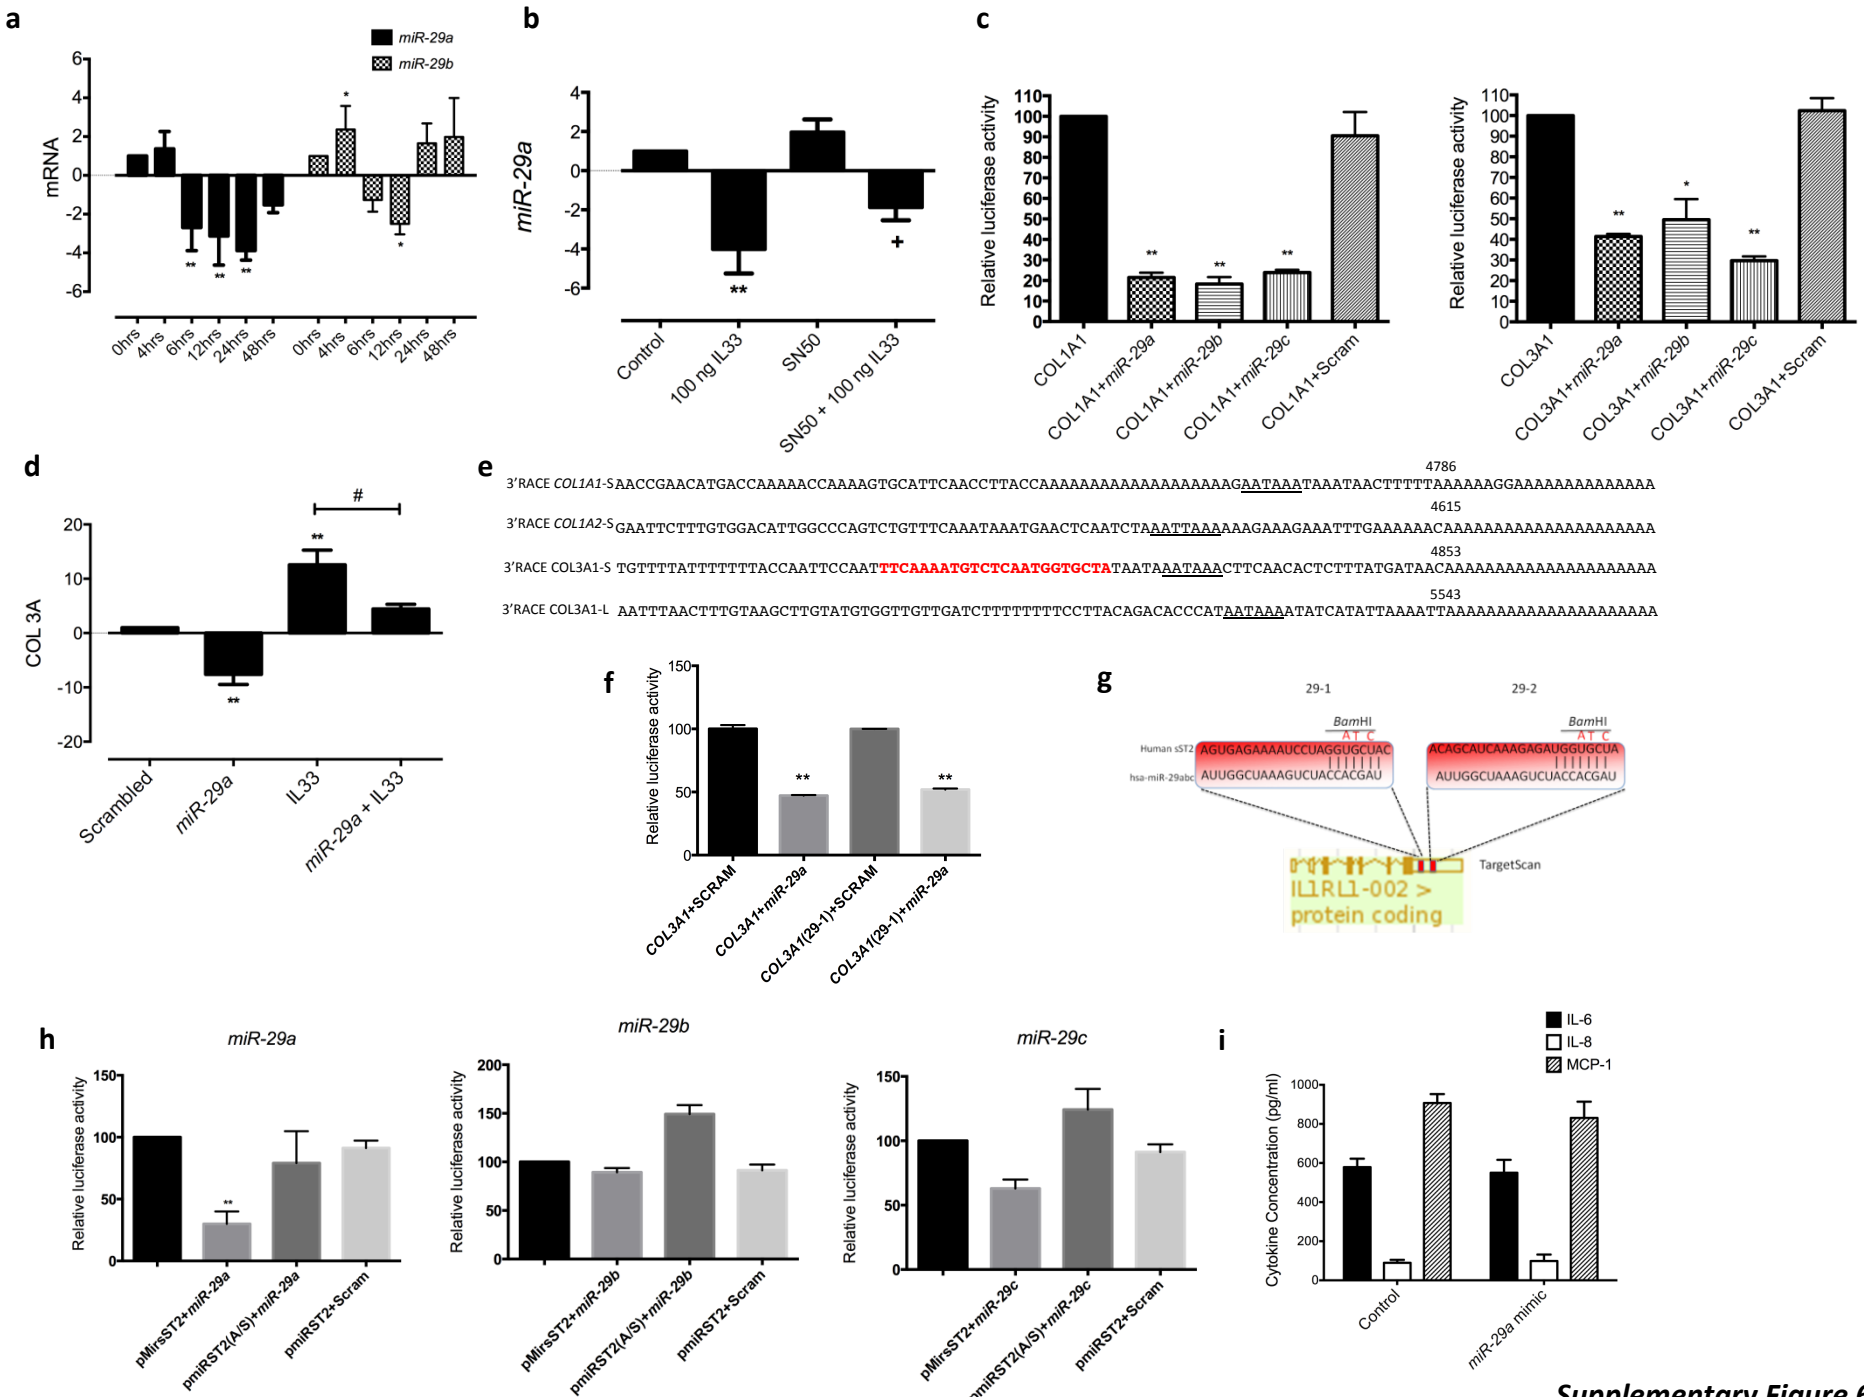

Supplementary Figure 6

## Supplementary Figure 6

*miR29a* biology. (a) Time course of *miR-29a* and *miR-29b* expression in human tenocytes (normal controls) cultured with IL-33 *in vitro*. \* $p < 0.05$ , \*\* $p < 0.01$  vs 0 h. (Student's *t* test). (b) Control human tenocytes were cultured as indicated for 24 h with rhIL-33 and /or NF $\kappa$ B (SN050) inhibitor. \*\* $p < 0.01$  vs DMSO control. +  $p < 0.05$  vs 100 ng IL-33 (Student's *t*-test). Levels of *miR-29* in the cells were determined by q-PCR relative to *U6* housekeeping gene. Data are mean  $\pm$  SD of triplicate cultures, representative of 3 independent experiments. (c) Luciferase activity in HEK 293 cells transfected with precursor *miR-29 a/b/c* (pre-*miR-29*) containing 3'UTR of *COL1* or *COL3*. Activity was determined relative to controls transfected with scrambled RNA (defined as 100%). Data are mean  $\pm$  SD of triplicate cultures, representative of 3 independent experiments. \* $p < 0.05$ , \*\* $p < 0.01$  vs scrambled control. (Mann Whitney). (d) *COL3* gene expression following addition of *miR29a* mimic and/or 100 ng rhIL-33 in human tenocytes relative to *GAPDH* housekeeping gene. Data are mean  $\pm$  SD (n=3). \*\* $p < 0.01$  vs scrambled control, # $p < 0.05$ .. (Student-*t* test). (e) Sequences of 3'RACE products of tenocyte collagen transcripts. Polyadenylation signals are underlined *miR-29a* binding site shown in red. (f) Luciferase assay on *COL3A1* 29a MRE site mutated luciferase reporter construct. Activity was determined relative to controls transfected with scrambled RNA (defined as 100%). Data are mean  $\pm$  SD of triplicate cultures, representative of 3 independent experiments. \*\* $p < 0.01$  vs scrambled control. (Mann Whitney). (g) Figure showing seed regions of the two Targetscan predicted *miR-29a* MRE sites: 29-1 and 29-2. (h) Co-transfection of HEK 293 cells with pre-*miR29a*, b. c containing 3'UTR of soluble *ST2*. A/S, antisense. *miR-29a* significantly reduced the relative luciferase activity compared with scrambled RNA-transfected controls (gene + scam indicates positive control), (n = 3). \*\* $p < 0.01$  vs control. (Mann Whitney). (i) IL-6, IL-8 and MCP-1 production in tenocytes cultured with *miR-29a* mimic and analyzed by Luminex. Data are mean  $\pm$  SD of duplicate samples, representative of five individual experiments (Mann-Whitney).

Please indicate if the tenocytes were from the "control" group, for all cases human tenocytes are used.

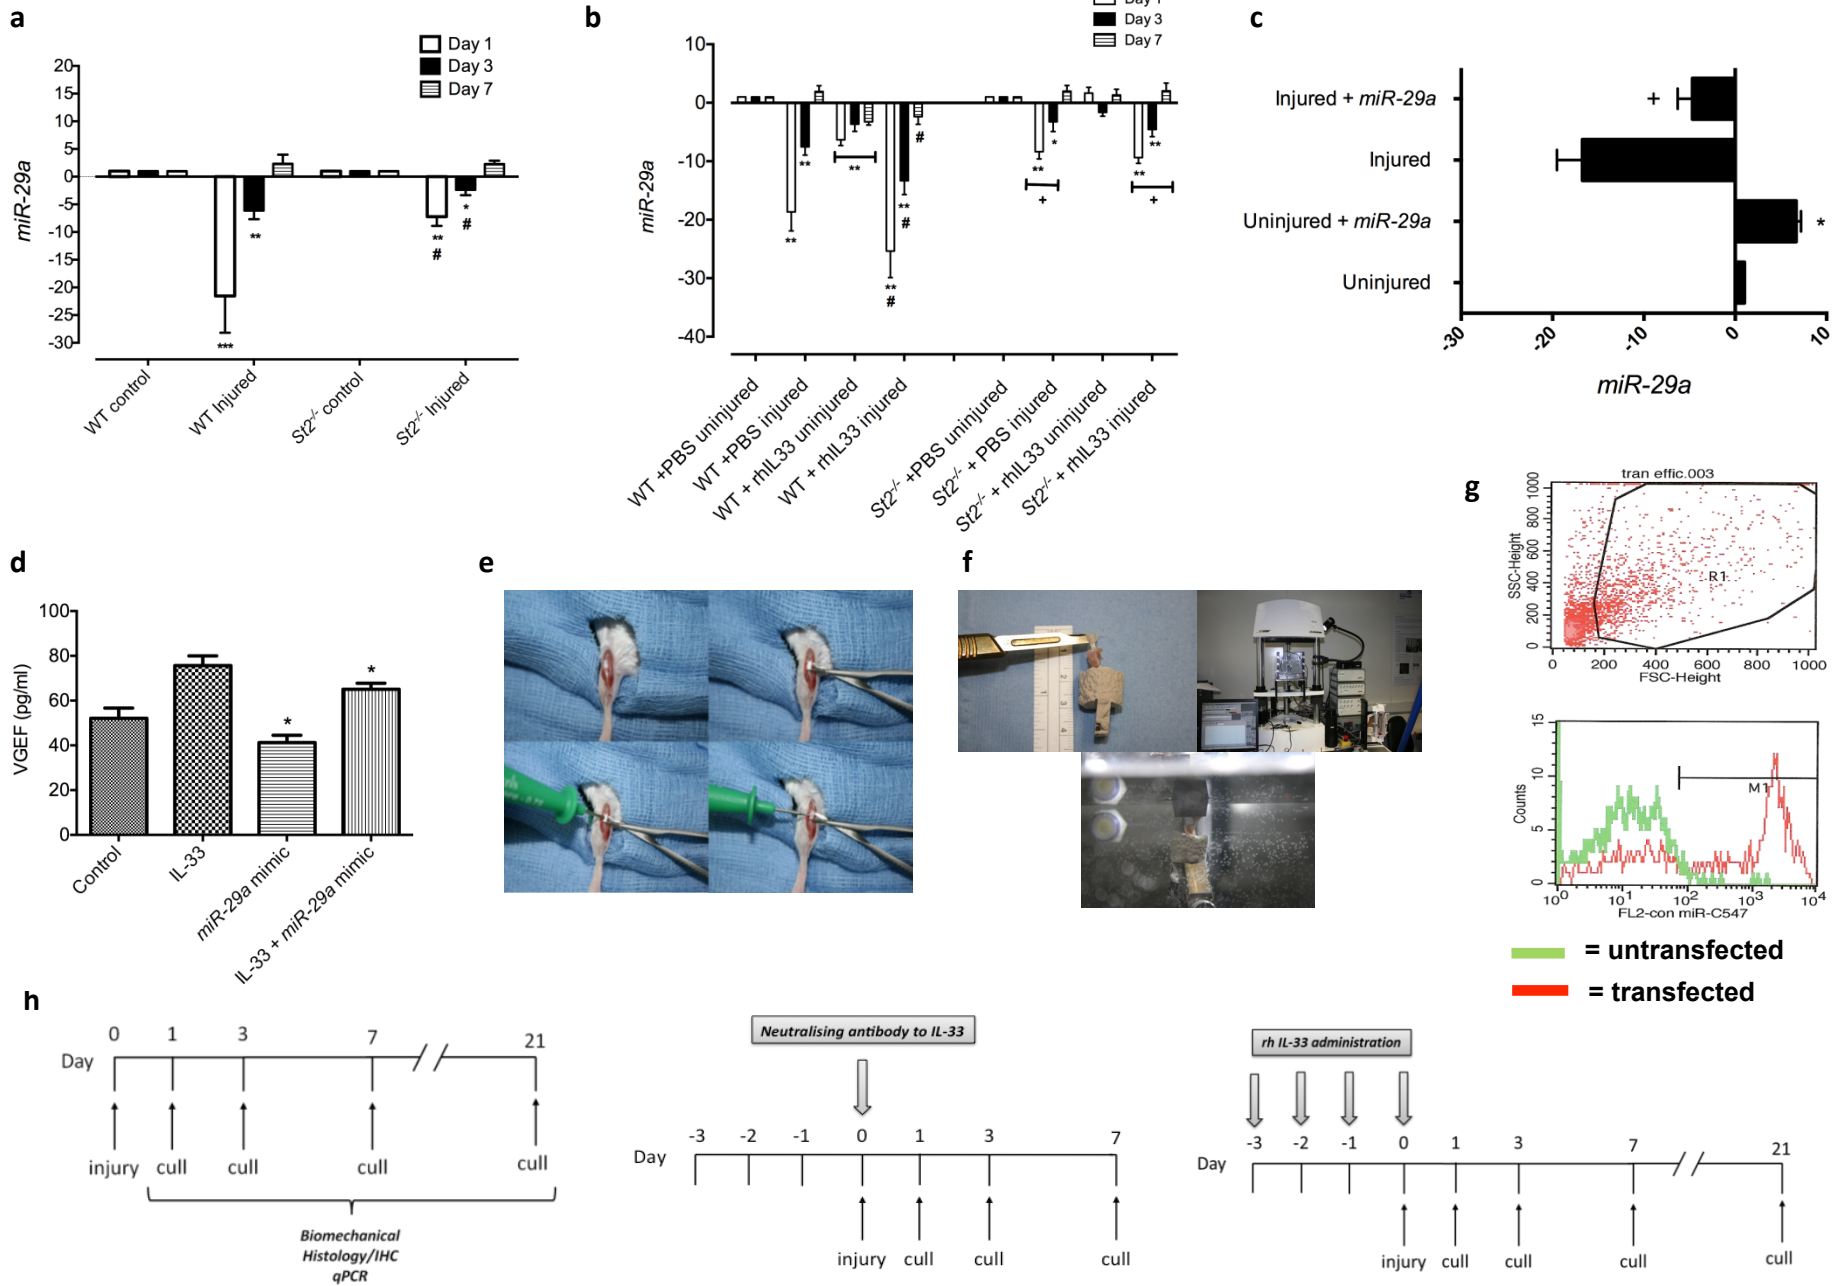

Supplementary Figure 7

## Supplementary Figure 7

*miR-29a* expression *in vivo* and experimental protocols. (a) Quantitative PCR showing time course of *miR-29a* expression in the tendon of WT and *St2*<sup>-/-</sup> mice. Data are mean fold change  $\pm$  SD of duplicate samples, representative of 4 mice per group. \* $p < 0.05$ , \*\* $p < 0.01$ , \*\*\* $p < 0.001$ , injured versus uninjured mice. # $p < 0.05$ , WT versus *St2*<sup>-/-</sup> mice. [ANOVA]. (b) Quantitative PCR showing mean fold change  $\pm$  SD in *miR-29a* in WT and *St2*<sup>-/-</sup> mice in injured versus uninjured animals following treatment with rhIL-33 or PBS. \* $p < 0.05$ , \*\* $p < 0.01$ , \*\*\* $p < 0.001$ , injured versus uninjured mice. + $p < 0.05$ , WT versus *St2*<sup>-/-</sup> mice. (ANOVA) (c) Quantitative PCR showing fold change (mean  $\pm$  SD) in *miR-29a* in WT mice in injured versus uninjured animals following treatment with mir29a or PBS on day 1 post injury. \* $p < 0.05$  uninjured PBS vs uninjured +miR-29a mimic, + $p < 0.01$  injured PBS vs injured + *miR-29a* (ANOVA). Levels of *miR-29a* are relative to *U6* housekeeping gene. (d) VEGF protein expression in tenocytes treated with 100 ng rhIL-33 and *miR-29a* mimic. (n=3), \* $p < 0.05$  vs untreated control. (Student-*t* test). (e) Photographs showing the patellar injury model. From top left clockwise; the tendon is exposed through a midline incision; scissors are passed behind the tendon to divide the overlying retinaculum and a 0.75 mm punch is placed through the mid-substance of the tendon. (f) Photograph of harvested tibia and attached patellar tendon and patella set in Isopon fixative prior to testing. The BOSE ElectroForce® 3200 test instrument used to test biomechanical strength. (g) Transfection efficiency was assessed by flow cytometry using labelled D547 mimic in human tenocytes. Transfection rates was  $>75\%$ . (h) Protocols for *in vivo* experiment and treatment with rhIL-33 /anti IL-33.

| <b>Tear Size</b>                            | <b>Control</b> | <b>Small (&lt;1cm<sup>2</sup>)</b> | <b>Medium(&gt;1-3cm<sup>2</sup>)</b> | <b>Large (&gt;3-5cm<sup>2</sup>)</b> | <b>Massive (&gt;5cm<sup>2</sup>)</b> |
|---------------------------------------------|----------------|------------------------------------|--------------------------------------|--------------------------------------|--------------------------------------|
| Number of cases                             | 10             | 6                                  | 6                                    | 3                                    | 2                                    |
| Male:Female ratio                           | 6:4            | 4:2                                | 4:2                                  | 2:1                                  | 1:1                                  |
| Mean age in years(range)                    | 30 (18-38)     | 50 (39-58)                         | 54 (50-62)                           | 54 (47-60)                           | 63 (50-71)                           |
| Mean duration of symptoms in months (range) | 8.7 (1-20)     | 5.9 (2-15)                         | 7.2 (3-19)                           | 8.5 (4-18)                           | 5.7 (2-12)                           |
| Mean number of steroid injections           | 0              | 2.0                                | 1.6                                  | 1.2                                  | 1.3                                  |

Supplementary Table 1  
**Patient details and demographics**
